# Supplementary material for: Game—The Dressing Change Game
Source: Atypon-hosted journal article supplement (doi:10.1287/ited.2014.0133), 2015-01-01

### General Instructions:

1. You are a nurse on a general surgical/medical unit. Your objective is to provide safe care to your patients.
2. You also want your unit to have the highest profitability and lowest quality problems. Each patient you treat earns your unit \$20 in revenue. Therefore, you want to accurately complete your entire work stack within the game's time limit of 7 minutes. You must treat your patients in the order in which they appear in your work stack.
3. Your patients need dressing changes. "Dressings" or "sponges" are gauze pads that soak up fluids that otherwise would irritate the patient's skin. Dressings are sterile and great care must be taken to avoid contaminating dressings. There are two types of dressings:
  - "4x4" Sponges are a square of fabric. These can be used to cover a wound without a drain tube. There are 2 regular sponges in each sterile pack.

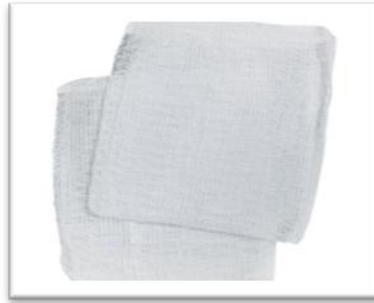

Figure 1. 4x4 Sponges

- "Drain Sponges" have a cross-shaped slit. This slit enables the sponge to fit around tubing that may be placed in the patient. These pre-slit sponges make it faster for nurses to place the dressing on the patient; otherwise, they have to cut the slit on a regular sponge to place around the drain. There are 2 drain sponges in each sterile pack.

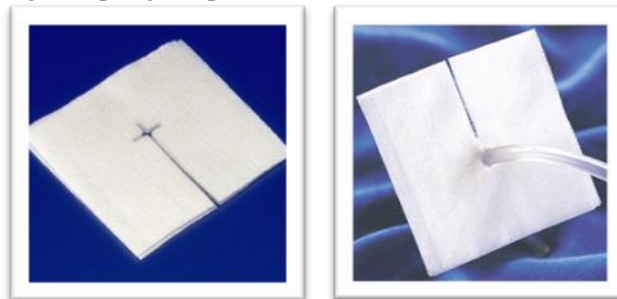

Figure 2. Drain Sponges

*To change a dressing, follow these steps.*

1. If instructed to do so, treat the wound.
2. Apply the dressing. **Always use a sterile dressing from an unopened package. Unused ones are no longer sterile and must be thrown away in the regular trashcan.**
3. Secure the dressing with tape.

### IMPORTANT

- Only use a pair of scissors for one patient. Do not re-use scissors. Get a new pair from a new sterile pack.
- Your unit wants to stay under its supply budget, so please be prudent in your use of supplies.

|                               | Cost per pack | # of packs stocked on your unit |
|-------------------------------|---------------|---------------------------------|
| ○ 4x4 sponges (per package)   | \$0.158       | 80                              |
| ○ Drain sponges (per package) | \$0.478       | 8                               |
| ○ Sterile packs               | \$1.044       | 60                              |

- Feel free to get required supplies from other units if your unit runs out.
- Document your work and the supplies you use on the Nurse Documentation Sheet

# Nurse's Documentation Sheet

Hospital #:

Name:

| Task         | Completed<br>(1=yes, 0=no) | # of <u>Drain sponge</u><br>packets used | # of <u>Regular 4 x 4</u><br>packets used | # of Sterile<br>Packs used |
|--------------|----------------------------|------------------------------------------|-------------------------------------------|----------------------------|
| 1            |                            |                                          |                                           |                            |
| 2            |                            |                                          |                                           |                            |
| 3            |                            |                                          |                                           |                            |
| 4            |                            |                                          |                                           |                            |
| 5            |                            |                                          |                                           |                            |
| 6            |                            |                                          |                                           |                            |
| 7            |                            |                                          |                                           |                            |
| 8            |                            |                                          |                                           |                            |
| 9            |                            |                                          |                                           |                            |
| 10           |                            |                                          |                                           |                            |
| <b>TOTAL</b> |                            |                                          |                                           |                            |

| Supplies                                | Cost     |
|-----------------------------------------|----------|
| 4x4 Drain Sponge Pack<br>(2 per pack)   | \$ 0.478 |
| 4x4 Regular Sponge Pack<br>(2 per pack) | \$ 0.158 |
| Sterile Tray                            | \$ 1.044 |
| Paper Tape                              | \$ 0.578 |

## Task 1

---

Mr. Alex Kline, age 32, was in a car accident and punctured his lung. A tube was placed in his chest to help his lung heal.

1. Use a drain sponge for the dressing change and apply tape to secure it.

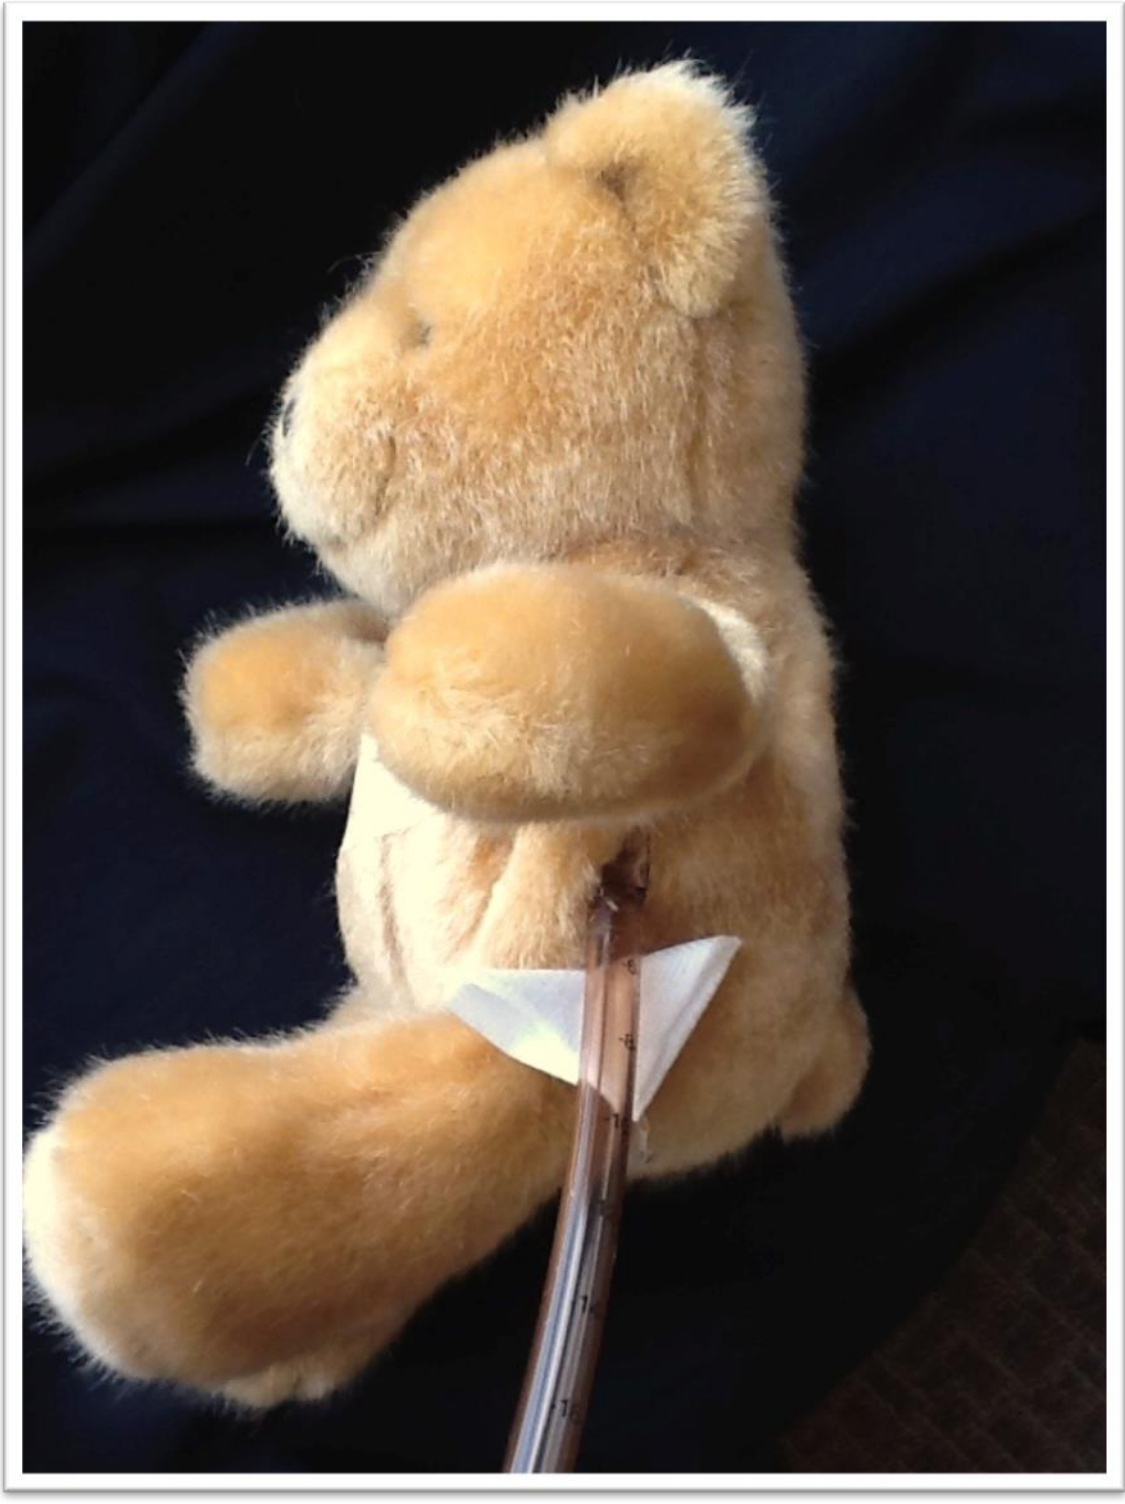

## Task 2

---

Mr. Jonathan Birkey, age 45, is diabetic and has a foot ulcer. Recently, he went to the doctor for his yearly physical, and the physician diagnosed a cut that was infected on his foot as cellulitis.

1. Use a pair of sterile scissors to cut a piece of a 4x4 dressing and pack it onto the open wound.
2. Place one clean 4x4 dressing on the wound and secure it with tape.

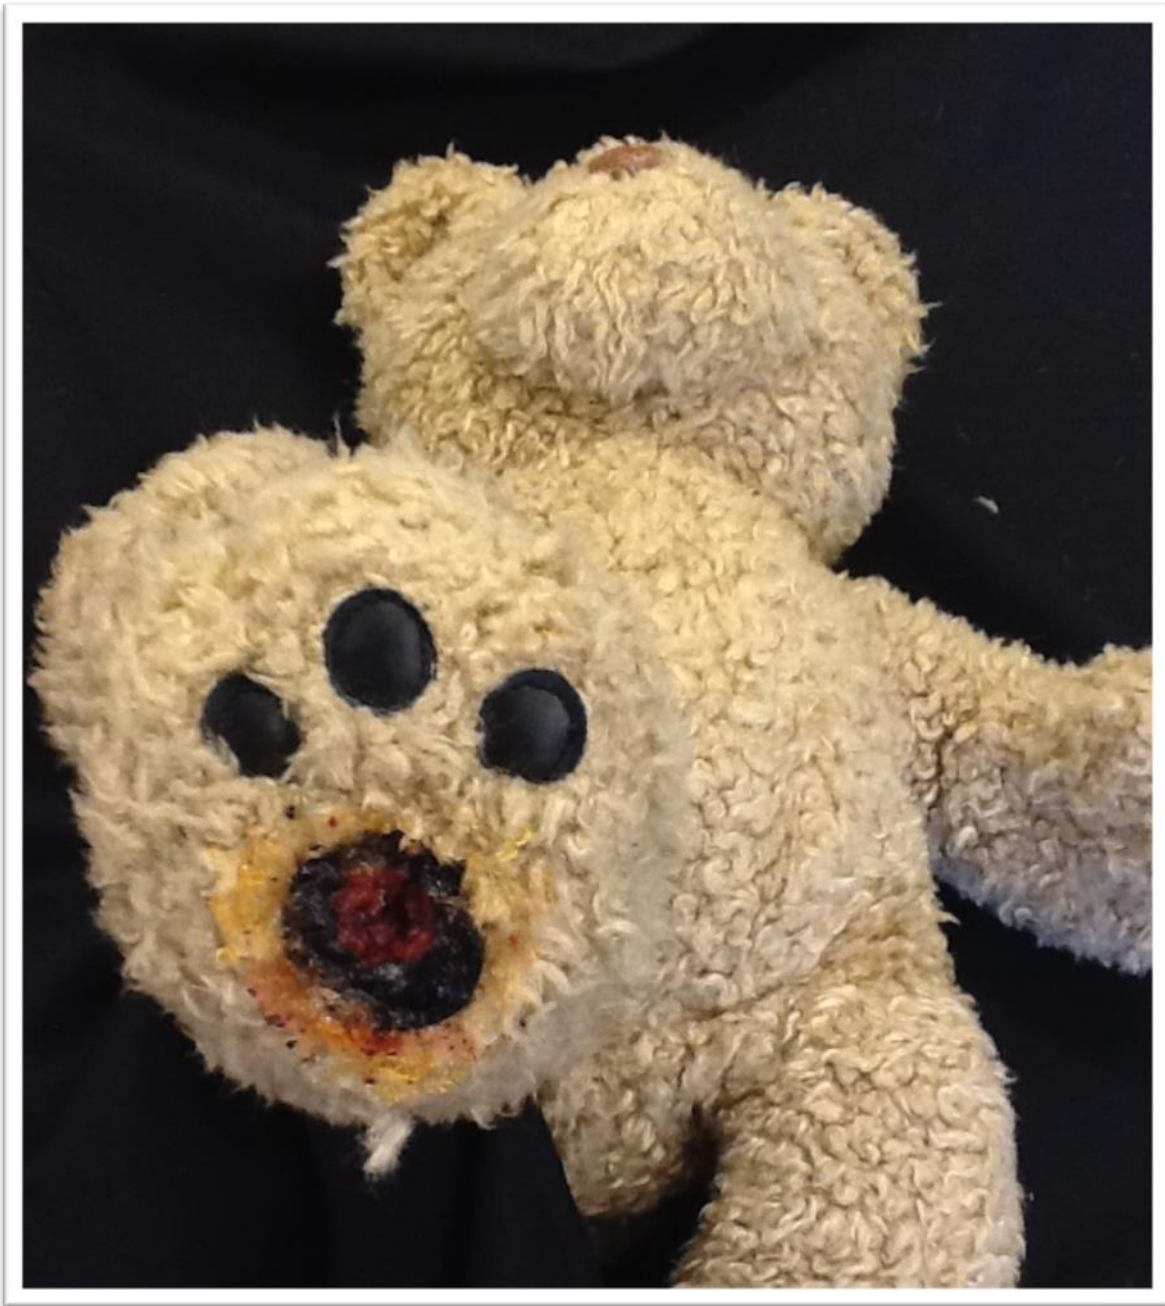

### Task 3

---

Ms. Naboot, age 60, recently had gallbladder surgery and developed an infection in her intestine after a reaction to antibiotics.

- Change her dressing, using a drain sponge to go around the tube coming out of her stomach.

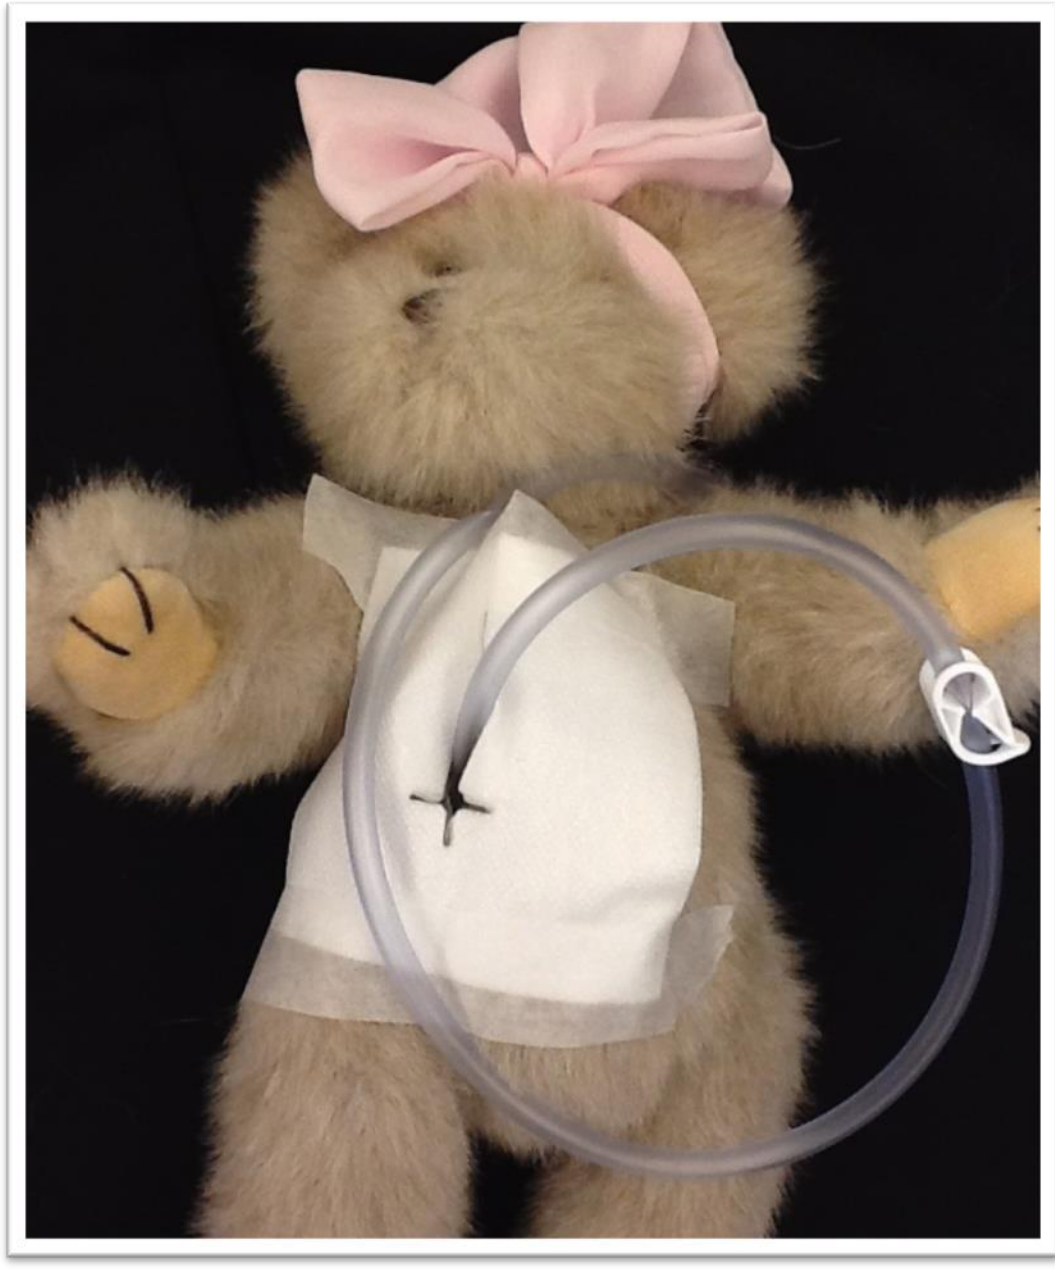



## Task 4

---

Mr. Samuel Barnes, age 23, is a trauma victim requiring surgical drains that will prevent fluid buildup from touching his skin. Today Mr. Barnes will be discharged with a drain in place and must assume responsibility for changing the dressing and keeping his skin dry.

1. Change his drain sponge.
2. Although it is not required, as you courtesy to him, and to help prevent readmissions, you want to provide him with at least 5 dressing changes to get him through the next few days. If you don't have enough drain sponges, you may give him 4x4s and sterile scissors (one for each pack of sponges).

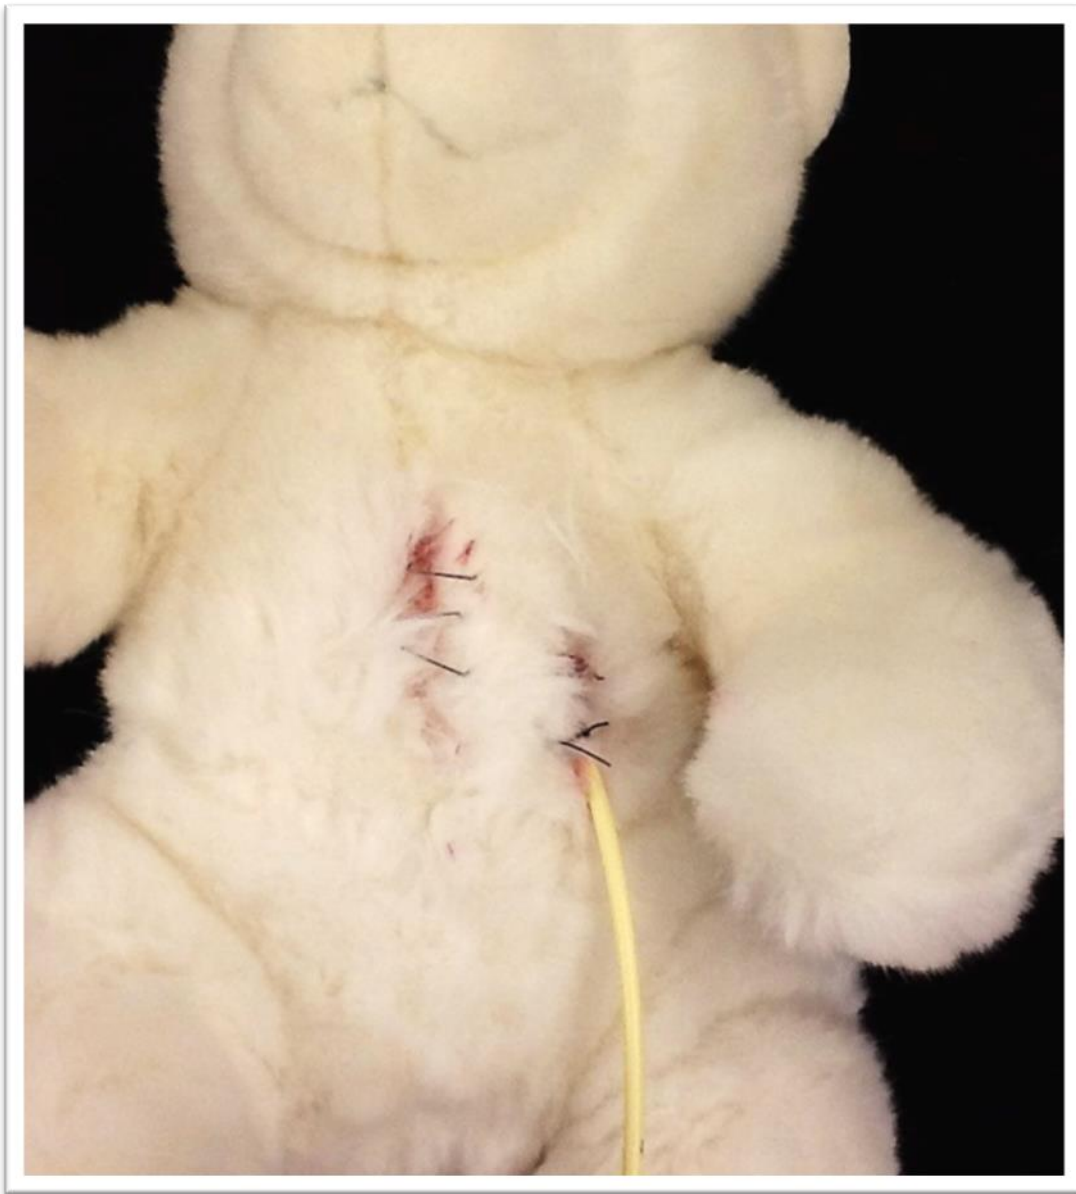

## Task 5

---

Mrs. Abdalla, age 70, was ironing when the iron slipped out of her hand and hit her ankle. She went to the emergency room and was admitted for a second-degree burn to her foot.

1. Place two clean 4x4 sponges to cover the burn and use the paper tape to secure the dressing.

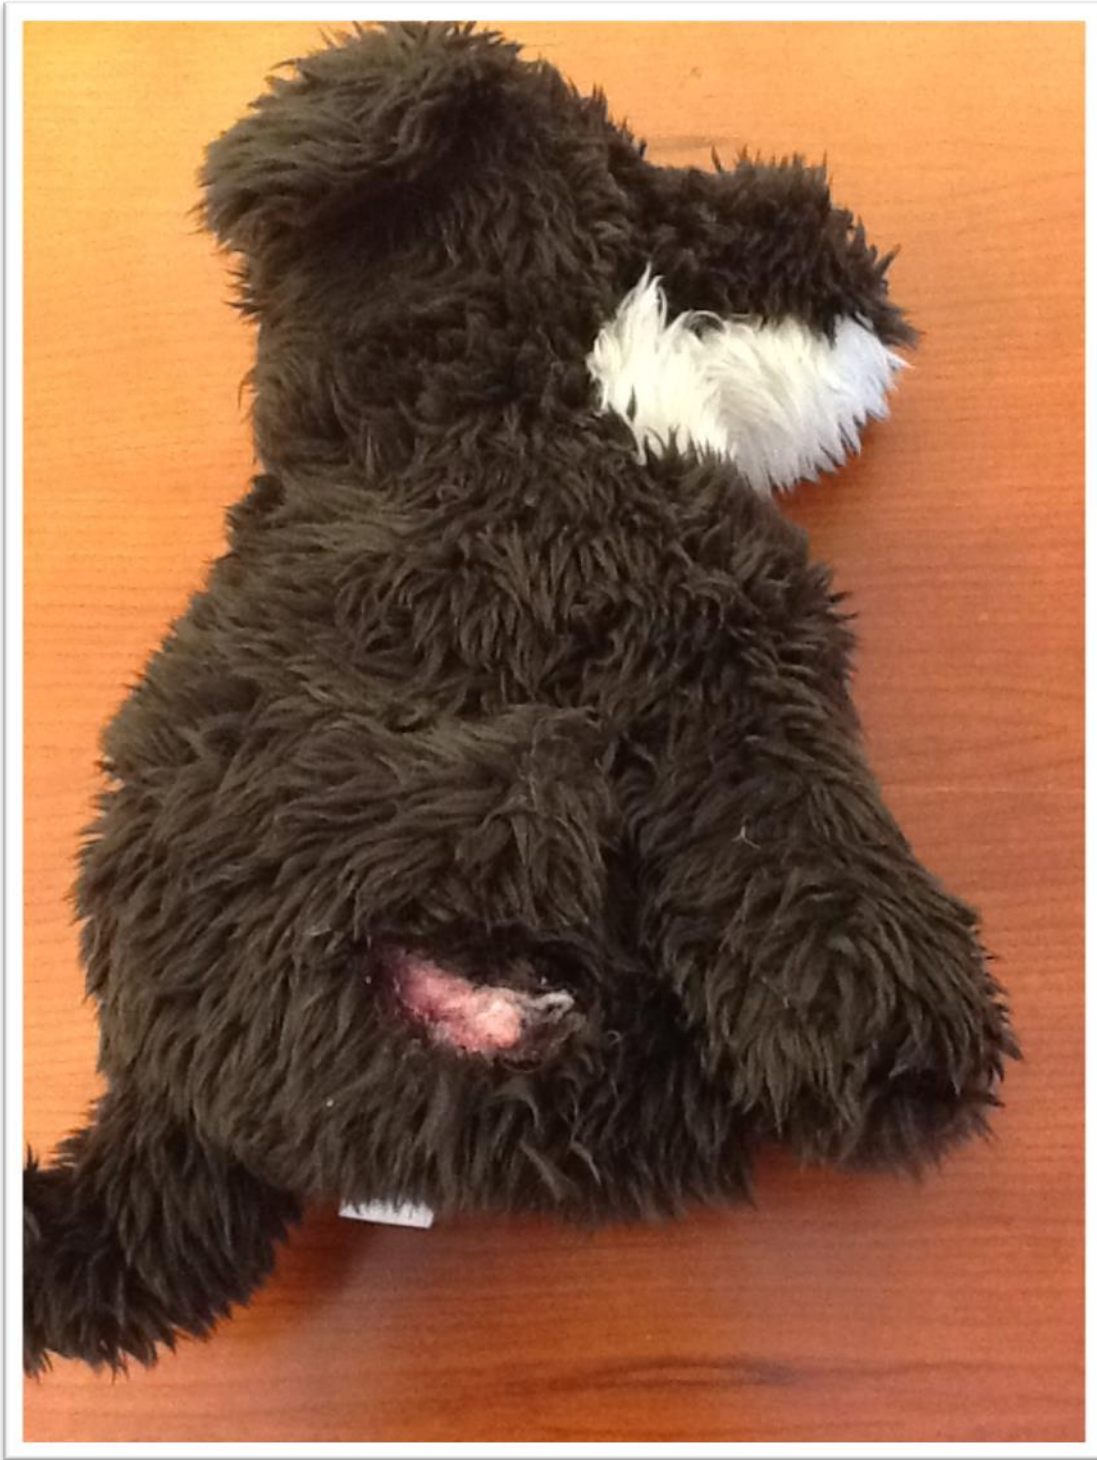

## Task 6

---

Ellie Evans, age 3, has gone through multiple surgeries, which required the placement of a feeding tube that Ellie will have to live with for the next 6 months.

1. Before discharging her, place a clean drain sponge around the feeding tube and secure with tape.
2. The mother has asked for 4 packages of sponges for her to use at home. She has a preference for the 4x4 sponges (with the sterile packs), but you may give her 4 drain sponges as well.

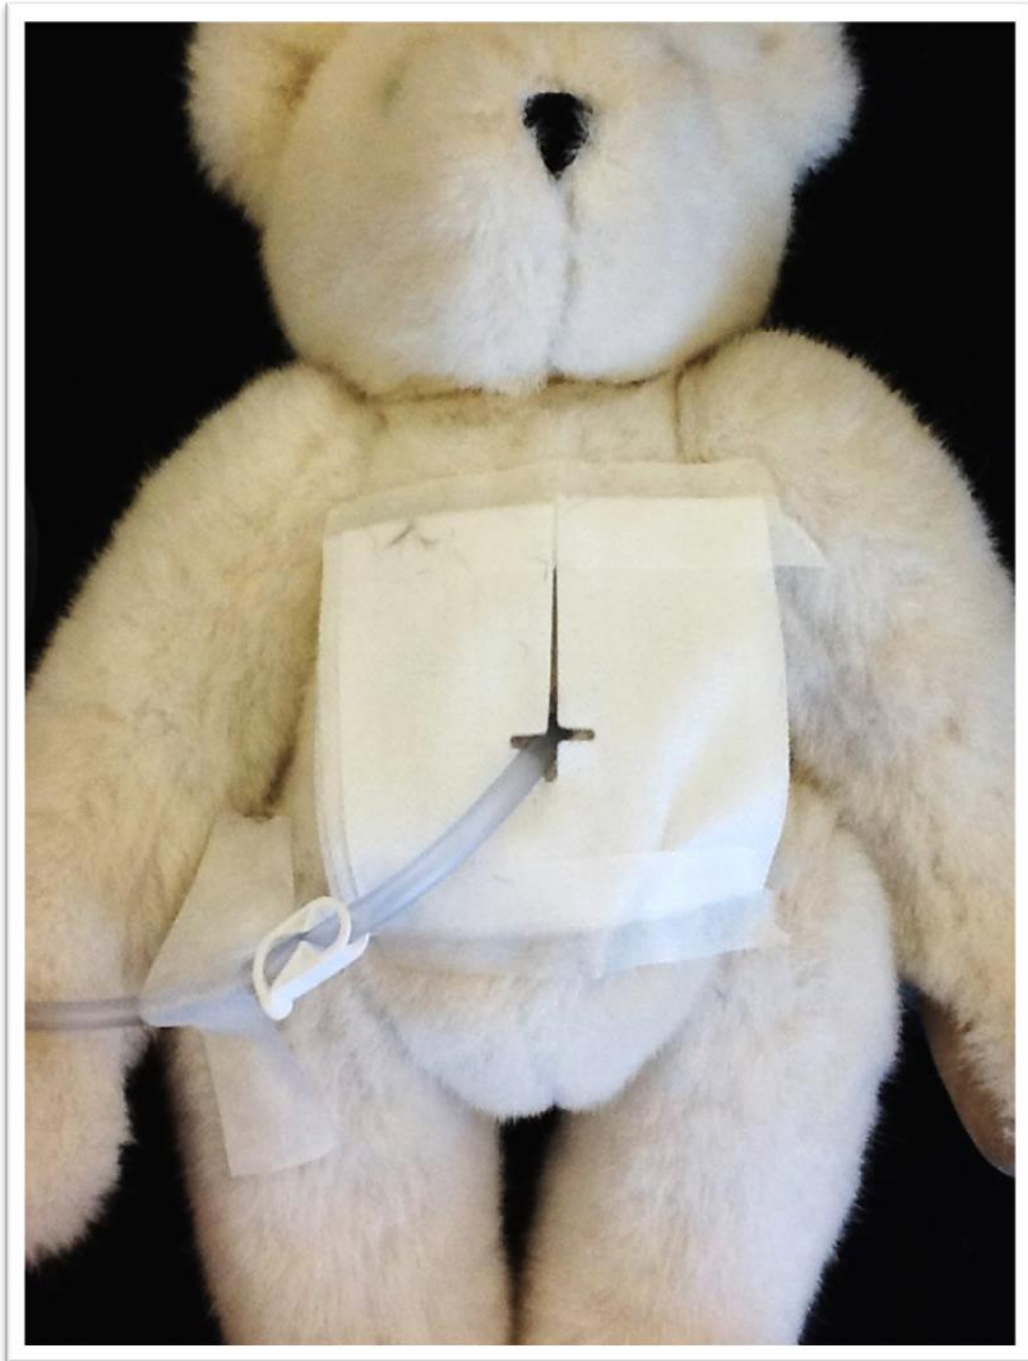



## Task 7

---

Mr. Teschuer, age 40, was diagnosed as suffering a stroke. The stroke impacted Mr. Teschuer's ability to swallow, and therefore, a "feeding tube" was inserted directly into his stomach and will remain until his swallow reflex improves.

1. He needs a new drain sponge dressing applied around his feeding tube.
2. Place tape on top to hold it in place.

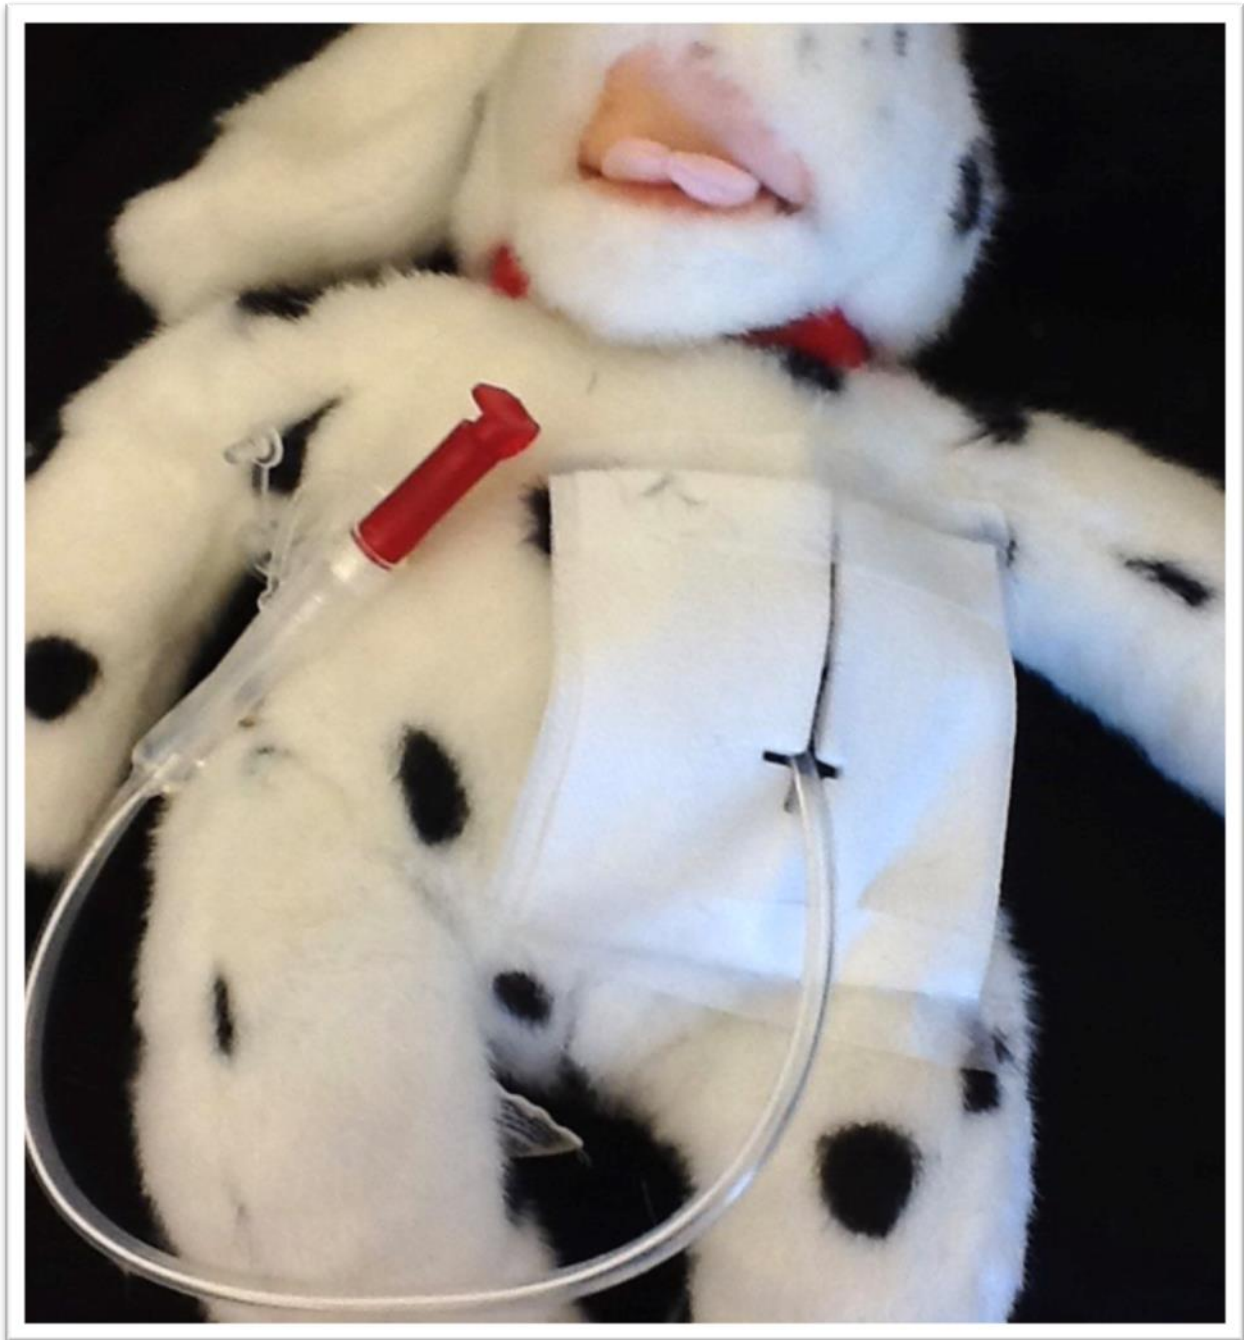

## Task 8

---

Mrs. Grace Humphries, age 42, had knee replacement surgery during which a tube was placed in the tissue to drain fluid and blood that often accumulate around the knee.

1. Change the drain sponge around the tube.
2. Tape it in place.

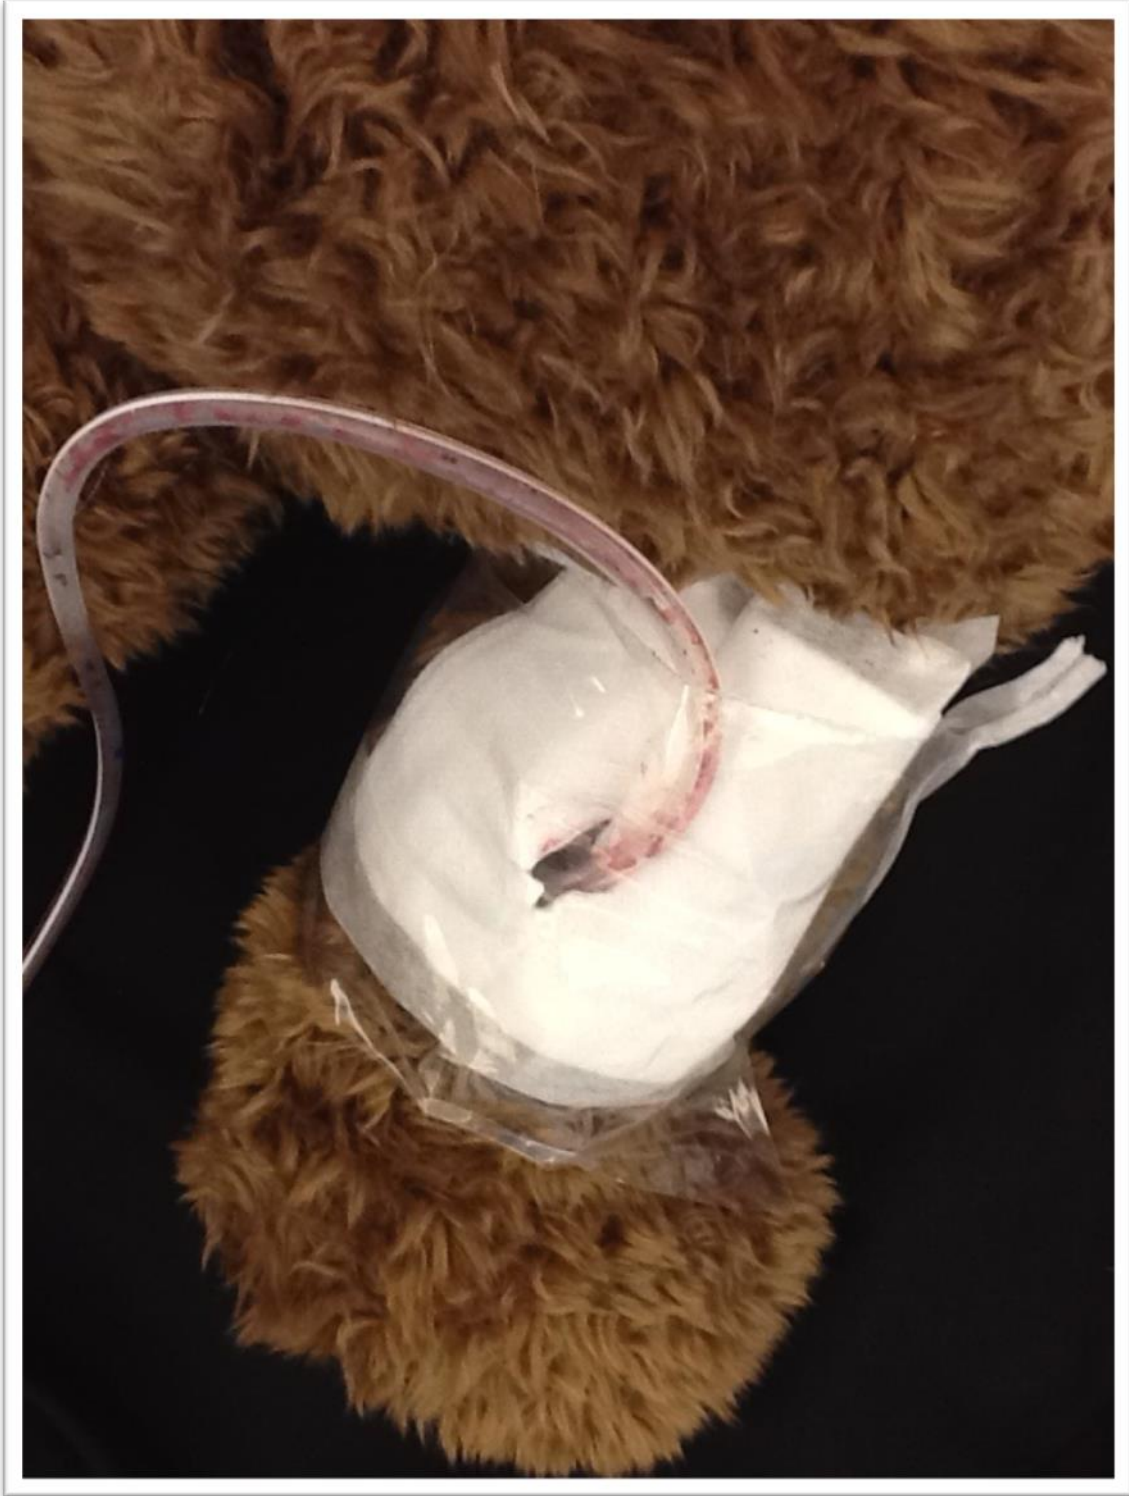

## Task 9

---

Mrs. Hazel Gabel, age 72, broke her foot and required emergency surgery. She came in for a follow-up exam, and her doctor discovered that the surgical site was infected and admitted her.

1. Change the dressing by covering the wound with two 4x4s dressings.
2. Tape in place.

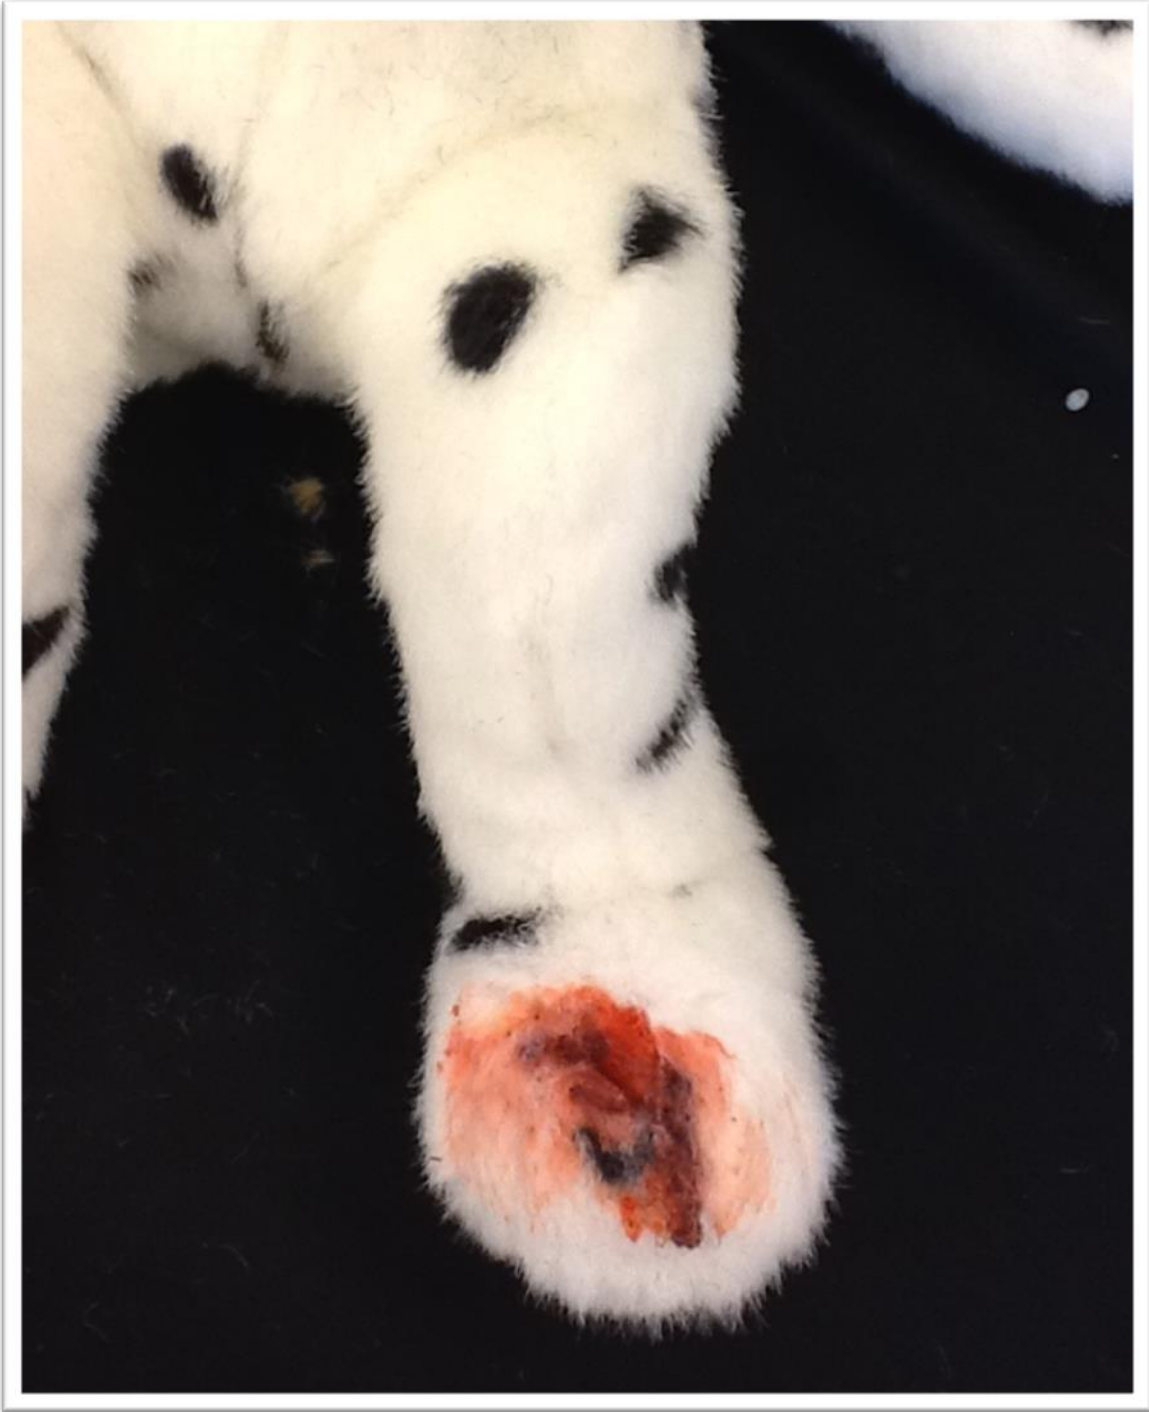

## Task 10

---

Mr. Franklin Youssif, age 38, has sustained a spider bite and was admitted for wound care and dressing changes. The doctor has ordered dressing changes twice a day that includes a saline wash, patting the area dry, and then placing a sterile dressing over the area.

1. (Pretend to) treat the wound with saline wash.
2. Cover the area with two 4x4s sponges.
3. Tape in place.

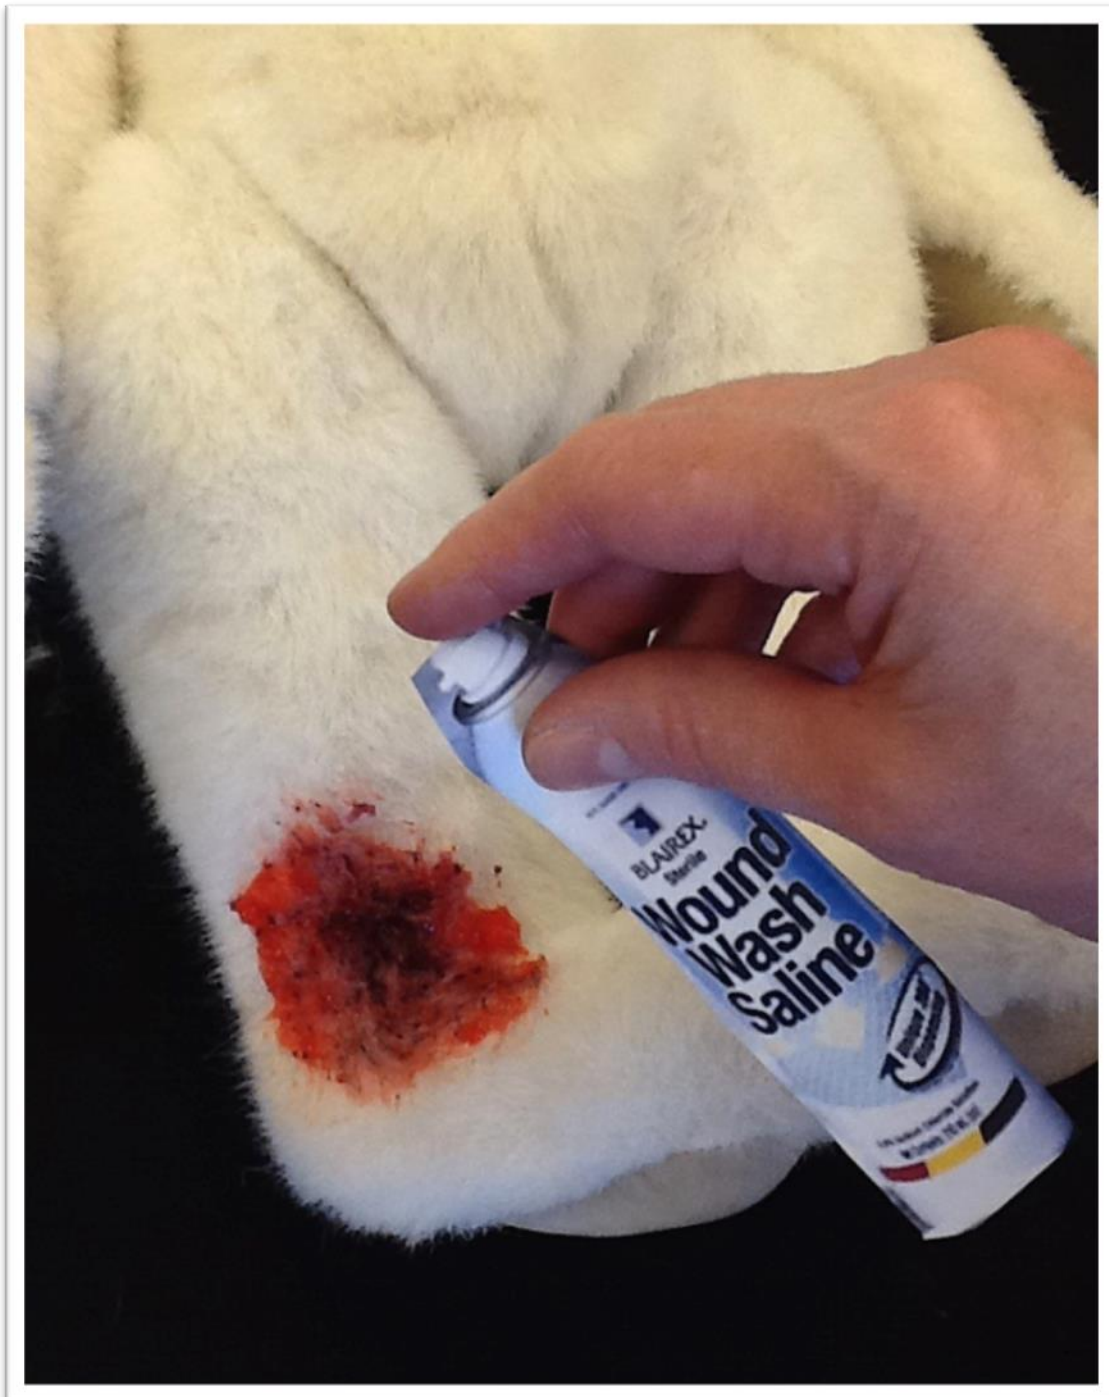

Supplement: ited.2014.0133-sm.zip [file DressingChangeGame.pdf › DressingChangeGame.pdf]
