# Supplementary material for: Game—The Dressing Change Game
Source: Atypon-hosted journal article supplement (doi:10.1287/ited.2014.0133), 2015-01-01
Supplement: ited.2014.0133-sm.zip [file Auditor_Datasheet.pdf › Auditor_Datasheet.pdf]

# Auditor's Documentation Sheet

Hospital #: \_\_\_\_\_

| Task  | <u>Completed?</u> |         |         |         | <u>Provide:</u><br><br><b>TOTAL<br/>Number<br/>completed</b> |
|-------|-------------------|---------|---------|---------|--------------------------------------------------------------|
|       | Nurse 1           | Nurse 2 | Nurse 3 | Nurse 4 |                                                              |
| 1     |                   |         |         |         |                                                              |
| 2     |                   |         |         |         |                                                              |
| 3     |                   |         |         |         |                                                              |
| 4     |                   |         |         |         |                                                              |
| 5     |                   |         |         |         |                                                              |
| 6     |                   |         |         |         |                                                              |
| 7     |                   |         |         |         |                                                              |
| 8     |                   |         |         |         |                                                              |
| 9     |                   |         |         |         |                                                              |
| 10    |                   |         |         |         |                                                              |
| Total |                   |         |         |         |                                                              |

| Supplies                                | Cost     |
|-----------------------------------------|----------|
| 4x4 Drain Sponge Pack<br>(2 per pack)   | \$ 0.478 |
| 4x4 Regular Sponge Pack<br>(2 per pack) | \$ 0.158 |
| Sterile Tray                            | \$ 1.044 |
| Paper Tape                              | \$ 0.578 |

| Alternate Inventory<br>Method           | Beginning<br>Inventory | - Ending<br>Inventory | = # used |
|-----------------------------------------|------------------------|-----------------------|----------|
| 4x4 Drain Sponge Pack<br>(2 per pack)   | 4                      |                       |          |
| 4x4 Regular Sponge Pack<br>(2 per pack) | 40                     |                       |          |
| Sterile Tray                            | 30                     |                       |          |

|                              | <u>TOTAL PACKS USED</u> |         |         |         | <b>TOTAL PACKS USED</b> |
|------------------------------|-------------------------|---------|---------|---------|-------------------------|
|                              | Nurse 1                 | Nurse 2 | Nurse 3 | Nurse 4 |                         |
| 4x4 <b>Drain</b> Sponge Pack |                         |         |         |         |                         |
| 4x4 Sponge Pack              |                         |         |         |         |                         |
| Sterile Pack                 |                         |         |         |         |                         |
