# Supplementary figures and images for: Game—The Dressing Change Game
Source: Atypon-hosted journal article supplement (doi:10.1287/ited.2014.0133), 2015-01-01

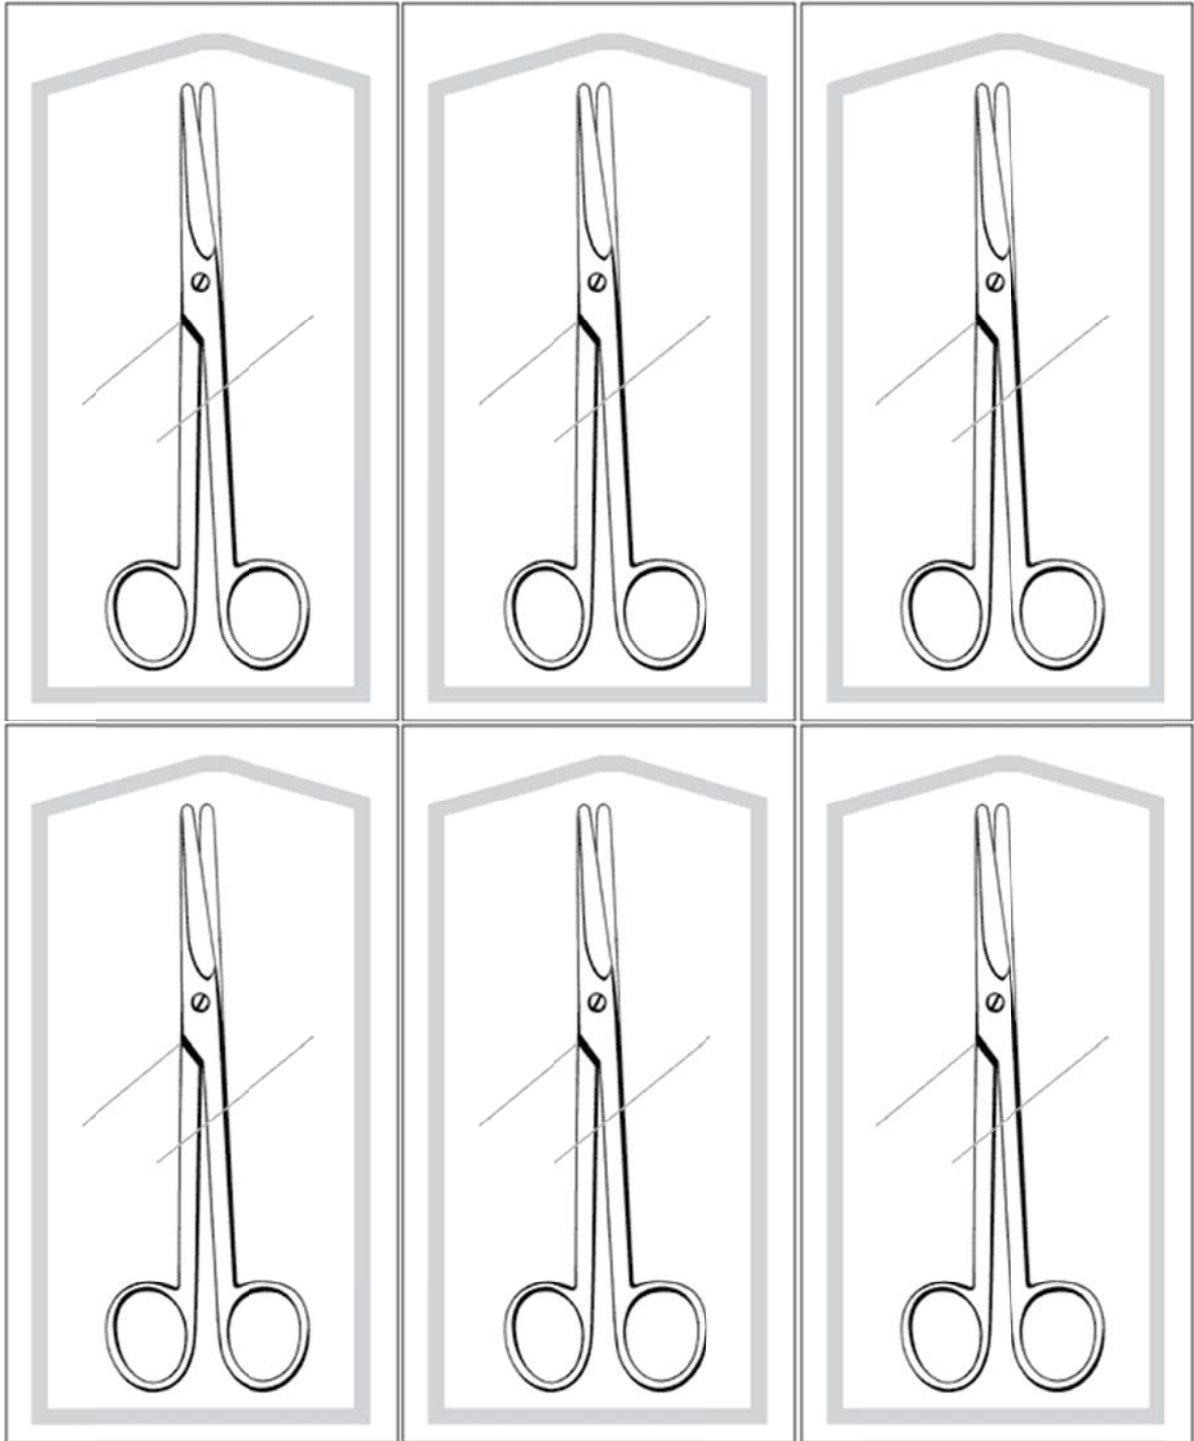

Supplement: ited.2014.0133-sm.zip [file scissor_cutouts.pdf › scissor_cutouts.pdf]
